# Supplementary material
Source: MDPI journal article supplement (https://www.mdpi.com/2071-1050/7/9/12539)
Supplement: s1 [file s1]

## Sheet: QualitativeAnalysis
		Authority		Developer			Consultants			Contractor		Retailer - Tenant/Investor
		RED Manager	Chief of Zoning	RED Director	Development Director	Sustainability Manager	Main Architect	Traffic Designer	Commercial Director	Design Director (Res.)	Construction Director	Development Manager	Development Manager
	Role in the Case/Project	To "grease" the city administration to control large urban development projects Structure and coordinate a legal framework (land use agreements to steer the city’s vision)	To steer the development from an urban planning point of view and create an environment were people thrive.	Residential Development, Retail- and Shoppingcentre development and constrcution of the urban development (construction margin and development margin)	To create residential buildings for the residents in the urban area	As developer-contractor driving the sustainbility. The contractors role in this development is more of an integrators role => delivering additional value through integration.	As architect to create different solutions for the urban development	Urban designer consultant in the project. Additionally integrating designers within the urban scope	As a commercial consultant to assist in creating an attractive and runctional shopiing/urban centre entity	Design management and production of residential development for investors (B2B sales)	As a large and diverse (resitential, commercial and infrastructure construction) construction company we are urban developers in this development	Develop a profitable retail unit for the people in the urban area	Provide daily goods for the people in and around the Kivistö area
	Business model in the Case/Project	To create and maintain an attractive community/living environment which is competitive in relation to other cities urban areas	To develop and plan an environment through urban planning where people enjoy a comfortable living Designing a new area - greenfield	Develop an attractive investment vehicle with steady and large cash-flow from rent and drive risk down to attain a better price	To create the buildings and create a plattform what is between the buildings => indentity and values for the urban area	To create value through construction - efficient execution	As a consultant to process and mould the design of the urban area/city centre. Provide different (and new) design approaches for the client (not one appraoch/solution)	Consultants business model with a comprehensive view on the urban area	Consultants business analogy - By contributing with expertise and experience from an operative shopping centre	Be involved in the development with our competence we attain building right which is turned into quality and affordable residential products (creating value)	We engage through a two-folded business model: 1. Pure contractor from which the fee is used to developing new construction work 2. Developing new construction and additionally taking on development risks such as finding tenants and investors	Through sales, by creating profitable and sustainable retail units in align with current and future demand. Through optimizing purchase power analysis and technical requirements a profitable retail unit can be designed	Economic feasibility is the main driver to a funtional business. The object is to be present in an area 20-30 years In this case to optimize the facilities (m2) in relation to sales (cash-flow) in order to make profit
	Understanding Life Cycle Thinking	LCL is very difficult to control Nothing is permanent Right genuine usage (empty facility has no value) Adaptability - adjust to changes in time, especially for commercially	A city is planned for 1000 years, life cycle thinking as a cornerstone for urban development Vision for new urban area; functionality, visuality and sustainable urban development	Understanding the different business logics through the buildings life cycle Adaptability, expandability and flexibility -> services and tenants changing needs for the life cycle through design solutions Building and Functionality are the main components when analyzing from a life cycle perspective	Social life cycle - We want to create a social living environment which is endurable and sustainable Zoning defines the physical environement, we try to create the social	As a contractor we need to extend our thinking earlier to the development phase and later to the O&M phase As an investor I would question the contractor as a developer and its ability to genuinly consider the long-term perspective Trust issues in this industry prevents life cycle thinking	In an early phase investing in finding alternative solutions to be examined in the future There is life cycle thinking - but how much does it weigh in decision-making? Creating a flexibility buffer, a marginal investment from a life cycle perspective Contractors not "interested" in life cycle of the building, it is the investors interest in the long run Functionality is the key	Always striving for a long life cycle of the urban area where functionality is the main driver	Life cycle thinking challenging because everyone tries to maximise their own business -> someone should take a greater responsibility Owner should be involved earlier and commit to the development and construction. Institutional investors should have the resources	For us life cycle thinking comes through understanding the business model of our customer (investors). There is a significant diffrence between real estate funds (3-5y) and institutional investors (50+y) in terms of life cycle perspective	Lack of sustainability and life cycle thinking in commercial RED comes from the sub-optimization circle: Achieving affordable construction for the investors yield to work and ensure steady cash-flow. If we want the project to be executed, this means low constr. costs (vs. life cycle thinking) If higher inv. costs would be enforced (by regulation) they would be derived to consumers and residents	Life cycle thinking is a big part of our functions. We develop our retail units for 10+ years. Long investments and presence is emphasized wheter we invest ourself or act as a tenant. We always take full maintenance responsibility due to our unique function. Not always good to define life cycle (there are different life cycles within the urban area and services)	For us life cycle thinking is important. Investors does not always understand long-term benefit of certain technical investments-> jusifying viability of the investment All parties in development should have life cycle thinking
	Understanding Life Cycle Leadership	Economic feasibility is very important -> LCL is profitable operations and performance Building technology has a limited role -> Functionality is most important In life cycle optimization an expensive investment does not always lead to low O&M costs Life cycle leadership should be controlled - The right approach Changes has to done easily during the life cycle	If no leadership, there is uncertainities and nothing is controlled LCL can not be behind one person, it has to be a joint effort between the stakeholders (decide who coordinates it) There is always conflicts between stakeholders, especially between public and private-> a common interest has to be found	Life cycle leadership is about understanding the business models and what investments should be made regarding functionality Higher investment for lower operational costs -> break-even has to feasible for the business model(s) involved	We have to think ahead 20-30 years into the future - the social structure which we envisioned for the urban area	Including life cycle thinking to the general development process Life cycle thinking needs a systematic framework to function in the process	Somone should have the life cycle leadership in their agenda - a challenging role Projects need strong leadership In this project, no one has the role	Establishing pre-determined targets for the project, there is a lot talk about targets, but they are never properly managed Leadership focus on "programming" the project and together determining a quality level Lack of clear picture because the project is splitted into many parties with different interests Different life cycle approaches if the investor is involved in the project	People have to genuinly commit to the project Contractors acting like developers means a short time perspective We should succeed together (ecosystem thinking), e.g. maximizing or optimizing the rent roll? vs. value of the facilities comes maximizing LCL is about functioning and communicating with the community (social aspect)	In urban development we think from a sustainable life cycle perspective (functions, services, traffic solutions etc.) Decision-making is the challenge - the network were these decisions are made are diffuse and uncoordinated Long money has more life cycle thinking, but it is enough?	Zoning and society stipulates certain limits - but the responsibility should be with the end owner (investor)	Developers think and operate a shorter period (max profits and min costs), Investors has a longer perspective to consider. Adaptability is important for us, not to make too fixed design solutions which can be problematic in the future. Systems has to work 100%. If we are a tenant, upgrading and investing in systems is critical for our retail operation functionality.	It cannot be that every party is in charge for a certain part of the life cycle -> no one gains It has to be one party that who takes this responsibility Functionality is not always understood by construction companies
	Responsibility of Life Cycle	Life cycle leadership is derived from the city's vision I have difficult to see that the investors fund manager understand life cycle thinking, they are only interested in economic profit	Difficult question… The city should be responsible through legal zoning documents, the city represents the common good! The city's role changes during the life cycle, a need to secure certain things.	In the early phase it is important not to restrict future possibilities Towards the end, the one with the capital should make decisions (adaptability, energy-efficiency, reasonable operating costs) An investor-developer have a different approach than developer-contractor, the developer has to think as an investor	No one takes responsibility today, No one has the interest or incentive In residential development it can not be the residents, it has to be the city by ensuring certain measures during the life cycle The life cycle leader has to be neutral (not the develop-contractor)	No, there is no clear responsible actor for leadership Ideally the owner (earlier engagement), now interested only in profit Could be done together, partly responsibility to the city (especially if bigger urban area)	There is no clear responsible stakeholder for LCL The investor should be the responsible party It would be good if there was a separate guild/profession for LCL	There is no clear responsible stakeholder for driving LCL, no one looks at the "big picture", niche for a consultant? The city should have a stronger grip in the beginning from a life cycle perspective	No - it's lacking The investor should take a stronger role as the (future) owner The city? No, maybe not.	No, there is not a clear responsible stakeholder Land use and zoning should take a stronger life cycle approach. Zoning should be more responsible, they make superficial decisions and does not see the long-term perspective	In Kivistö there is no one yet, as long as we are in search of an investor (investor will commit once we have tenants, tenants need designs to commit) Zoning has an important task in guiding and steering Now the responsibility sits with the developer, the investor should enter earlier!	Investors should have a life cycle responsibility (but every stakeholder for themselves) The city is one stakeholder looking after the sustainable life cycle, but zoning makes too definite guidelines -> initial investment too high which may lead to no execution (economic feasibilty is not understood by zoning)	No, there is a risk for sub-optimization in Kivistö The city does not have the right tools (zoning cannot limit and steer future opportunities and business models) Maybe an outside consultant could maintain life cycle management in the operational phase (e.g. Jumbo)
	Value Creation?	Yes, but it has to be controlled Technology has to be optimized, not limit future needs Designers have much to learn considering life cycle, they dont see how the premises are used in the future Architects usually can cause limitations of fufture use Investors should ready themself with possibilities, not money (experienced investors understands this)	Yes, but how and what measures? An open discussion and logical process is important A life cycle ledership role is very important for the whole process	Yes, but value has to be concrete, tangible and measurable in order to justify investment, Economic feasibility is primary, then env. & soc. Additionally functionality should be the driver in value creation It is important that the investor is engaged in the right time to drive these issues (not too early or late)	Yes, but not for the contractor. Definetly for the city and communitiy How can we as a contractor ensure added value to the life cycle of the urban area? -> monitoring and feedback?	Yes, improved maintenancefor facilities, energy-efficiency, improved living quality -> sustainable value	Yes, value can be created through the life cycle analogy	Yes, definetly	Yes, social affets and responsibility is an important driver, affets economic and environemental factors Value is created by "taking care" of all actors (tenants in shopping centre)	Yes, energy and maintenance costs (but in residential development these costs are marginal) Value creation through maintaining the a sustainable area and not falling apart	Yes, but very challenging in practice All should "bargain" with their costs to achieve life cycle "value"	Yes, with the right design process which enable reservations considering the future Economic (cash-flow), Environmental (saving energy) and Social (comfortable environemtn) value can be enhanced	Yes, smart life cycle thinking creates value to all stakeholders and their business models Adaptability is very important
	Tools for improving Life Cycle	Tools are important, but they have to be used for the right things and right purpose Tools could be apart of legislation/permit administration LCC environmental and economic value supports each other, should be more used	No sufficient tools today, it has to be neutral, comprehensive and diverse. Discussion for shared logic and common interests is vital Leadership in private and public is very different. In public, strategy needs more continuity and more focus on economic outcome In the city's organisation life cycle leadership should be given a role there would be a demand for it	A discussion framework to communicate targets with all the actors in the project/system (especially from a env. & soc. perspective, economic parameters drive the development strongest) Other assessment tools are supportive to the discussion framework	A clear and good process from the beginning Systematic surveillance during the life cycle -> Responsibility to the owners (in residentail housing companies) BIM could be of value in developing these tools	Tools are important, but a part of the process (The process is the most important tool for communication and coordination) Right tools at the rigth time SLCAs bring measures to decision-making (has to be objective tools)	Stakeholders should together create a life cycle leadership/management framework together Ability to sell added value through LCL to the investor (from burden to future opportunities) Tools should be developed to a "general" level and they should be measurable	Life cycle thinking should be involved for every stakeholder LCL is a management question and has to be communicated, partly from authorities Elements from life cycle models (PPP/PFI) should be utilized	An interaction tool to initiate open discussions between different stakeholders (not too stringent) -> Investor(s) and project management should commit stronger to the process Tools for justifying adaptability and economic parameters with a long term perspective	Practical design tools needs practical tools and processes for decision-making; life cycle tools for all parties involved, managing decision making from a life cycle perspective, analysing alternative design solutions and their life cycle impact	There are no appropriate tools today, some elements could be considered; energy simulation -> cost savings, including FM perspective in design, zonin should understand what to stipulate so that they dont "destroy" the technical product (owners bears the responsibility)	For us, analyzing our life cycle operations. Through legislation -> decreasing energy consumption Discussion tools on aligning targets for different business models and increasing understanding of different business models -> tarnsparent discussion on life cycle logic	A common general discussion tool created and accepted by everyone -> creating common value (every business model has their own tools) and common targets These targets has to be measured regularly in order to steer the development
