# Supplementary material
Source: MDPI journal article supplement (https://www.mdpi.com/2071-1050/7/9/12539)
Supplement: s2 [file s2]

## Sheet: QualitativeAnalysis
		Authority					Consultants			Property Management Services			Residential Investors				Public Investors		Office Investor	Mixed Investors						Retail Investors
		Head of Urban Planning Deapertment	Chief of Zoning Department	Technical Director	Technical Director	Head of Real Estate Department	Managing Director (Project Managment)	Partner (Sustainability)	Managing Director (Construction Management)	Chief Operating Officer	Facility Management Director	Managing Director	Managing Director	Real Estate Development Manager	Real Estate Development Director	Chief Analyst	Development Director	Investment Director	Real Estate Management Director	Real Estate Investment Director	Real Estate Development Director	Real Estate Development Director	Construction Manager	Real Estate Investment Director	Project Director	Real Estate Development Director	Managing Director
	Role in Ecosystem	Responsible for Zoning and urban design (incl. Traffic arrangements)	Responsible for general- and detail zoning for the City	Land use planning, zoning, providing infrastructure, managing legislation of urban development and environenmental protection Zoning for both public and private land, representing the "big picture" in urban development	Responsible for Regional-, urban,- and land use planning, zoning, development, legal permits, execution and beyond to the operational phase (maintaining buildings and infrastructure) Considering sustainbility and life cycle issues -> creating a built environment 100+ years	Responsible for real estate development (economic) and management of city's facilities and land plots	Providing expert services within project management (procurement, design management, procurement model facilitator)	We are an expertise oragansation providing services for environmental calssifications, design management, energy management (life cycle perspective) and user phase monitoring	To act as an consultant for construction and zoning development (real estate development)to the owner/cleint withi commercial development	To manage the FM services of buildings (public, office, production and logistics)	Providing services for users/owners in facility management and real estate development for both private and public clients We are engaged through the whole life cycle from zoning, development, renting, marketing, construction and O&M	To provide property management services for both national and international property investors Services include technical FM, administrative, asset management and tenant management services	To invest in residential buildings and create an alternative investment option from residental demand in strategic locations	To function as a residential investor and rent appartments for residents We also develop existing plots through complementary development (new building right)	Our objective is to own and rent residential appartments by developing ourselves, buying from develop-contractors and buying existing building stock and developing	To act as an instrument for residential investment in the Finnish market as a REIT fund	We act as an real estate owner for the Finnish University Facilities in Finland We facilitate and redevelop learning facilities to be more customer/client friendly and support their learning process	To invest, develop and maintain our current building stock for our users (state owned real estate company which provide facilities for state personel) Long term investments -> no transaction analogy which leads to sub-optimization	We see ourselves as unique stakeholder; developer-investor-operator in office campus/business parks (niche market)	We operate as an investor in the real estate sector	To develop, invest and own properties (office, retail and logistics) (also in zoning phase) Residential we do not own, but acquire partners in developing (part of urban/larger development)	To act as an property investor Our role starts from zoning and goes all the way to O&M phase	To invest in real estate (residential, rennovation, commercial, shopping centre, logistics, etc.) with a long-term perspective in Finland	Asset management for LocalTapiola real estate investments We do some minor real estate development, but we do not have the organisation for it as such (small asset management team)	To act as an property investor and additionally minor development of our own properties	To develop, construct (“rakennuttaa”) and invest with a long-term perspective in urban grossery anchored shopping centres	To act as an investor of shopping centres, shopping centre management and development of shopping centres
	Business model in the Ecosystem	To create prerequisitites for urban development by creating zoning reserve and steering how the physical environment is being built	Creating a plattform for urban/real estate development for both public and private To zone urban areas to be succesful and good places to live in	Through zoning, increasing the value of land and creating a plattform for urban development	To establish and create the plattform for urban development - possibilities and steering	To successfully manage and develop city's real estate according to the demand We try to represent the economic and feasibility perspective of urban development	Through understanding functionality of the user we provide added value to ensure the right outcome	We create value by assisting to achieve sustainability targets through certification tools and technical solutions. Setting targets, monitoring and following up.	Added value through providing coordination, technical expertise and management for projects and creating new purposes of land (cash-flow) for the owner	A total facility management model to manage risk and create synergies between dirrerent services from a holistic perspective	We capture value as consultants by providing expertise services As we dont invest ourself we see how money steers different stakeholders decisions	Through a fixed fee (TFM) for property management services including sanction mechanisms	To acquire residential appartents and sell them after a while to another investor or residents	We have a long-term investment perspective 20+ years We do not develop to make transactions – but due to market changes and some times we need to free capital in order to restructure our assets	To own and rent to residents Investment horizon is 70 years (not defined) -> long-term investment	To maximize rent profit, low maintenance costs through volume advantages (5-10%) We buy big volumes, we usually attain a 15% discount, when we sell the appartments to consumers we are able to make profits through the discount in the purchase price	To create and develop better learning facilities for students and thus attract students to our campuses and education	To provide optimal facilities for our user group and maintaining a heathy real estate asset portfolio	Through office spaces integrated with services we create a service offering in quality locations Similar business model as hotels (integrating services and facilities)	To invest in real estate to disperse risks, protect from inflation and acquire a steady cash-flow To gain a steady cash-flow for invested pension money with a reasonable risk	By developing feasible and functional properties which generate profit with a long term perspective (permanent ownership)	To develop and invest in property with a long-term perspective to gain steady profit as an insurance company (from a tenant and O&M perspective)	We have a significant role as a long-term investor – we want to differ from fund investment and contractor-developer => we strive for sustainable, responsible and time enduring investments	Through transactions (right time) make profit for our investments (depending on business cycles) Utilising optimal portfolio theory to diversify investments	To invest profitably and securily pension funds to real estate To find attractive real estate investments that fit our strategy	To create a real estate product for owning with a long-term perspective Steady and secure cash-flow from rents	To maintain and increase cash-flow (NOI) from tenants, alternatively through divestment By maintaining and increasing a high consumer number, our tenants do better, and we get the cashflow from the facility (value chain)
	Understanding Life Cycle Thinking	In our general planning work there is no life cycle perspective, this perspective should come from the industry We have some tools to manage, develop and steer, because of fragmented ownership and changing markets very challenging	Life cycle and sustainability is becoming increasingly important in urban development We strive for durable solutions and hope that our partners understand Who should regulate zoning, we or the market? Certain things should be in zoning We want to be involved when private land is developed, the owner is in a central role (commercial viability)	Naturally the city's perspective is long-term Selecting sustainable and durable solutions through legislation and steering In zoning, we strive to not “lock-in” to certain solutions, simutaneously we have the responsibility that the area will be as we envisioned, for this mechanisms should be created We need to be flexible in urban development with a long-term perspective in a changing market In …	The city is in a significant position in regard to life cycle thinking – it is in our scope to control/manage the life cycle (through our city strategy) Naturally, we cannot be 100 percent sure that the vision and development we provide will meet the future requirements and market demand – time span is very long vs. continuous changing conditions	Yes, there is sub-optimization in the whole development/life cycle of buildings (already sub-opt. in land use planning) The architecture is tuned up to such quality that the rents will not cover the invetsment and these projects may never be realized o A lack of common vision and clear targets (also internally)	To take an comprehensive/entirety perspective => define targets Manage the (construction) project We try to define the targets from the beginning from a life cycle perspective if we are involved early enough	We bring the life cycle perspective in our projects by making different kind of LC-calculations (gathering data and providing alternatives for decision-making) -> ways to justify decisions! -> possibilities for life cycle value Through certification tools we enable the commercial part of the project, and thus bringing a quality standard.	Depends on the client, if long-term investor, there is LCT, but short-term (e.g. close-end funds), do not see LC perspective Variations also depending on project and persons (const. or inv. background) Different products have different functionality life cycles (e.g. shopping centres vs. residential) -> what to optimize for?	Today: Unfuctional architectural design, Savings in design, cheapest construction and cheapest maintenance -> Not a good result -> In all stagess there is sub-optimization => this thinking is “applied” into every business models incentive programme -> vicious circle -> The investor should be responsible for this development Rational investments in the beginning leads to a smoother life cycle	We are engaged from the begining and can take responsibility for the whole life cycle Money is the strongest argument in decision-making (contractor optimizes 1 M €, when MV is capitalized -> 10 M €! -> sub-optimization) Funtionality of the building – optimizing the O&M costs for its funtionality -> focusing on the O&M which supports the buildings function! -> reflection on the market value!	Life cycle thinking is different depending on the owners investment strategy; long-term, own the property forever (optimizing maintenance costs and energy use), short-term (e.g. RE funds), focus on tenants immidiate needs Through our property management services the value is maintained and possibly increased (daily services and life cycle plan)	Life cycle management is too much focused on technical matters, real value comes from fuctionality Life cycle value should logically correlate with business logic and provide feasibility In our business the life cycle is quite short (1 to 5/6 years), we dont have this analogy, residual value is important	Life cycle thinking - strong connection with social responsibility Selectibg good locations (accessibility, services and public transport) Life cycle durability and feasibility (maintainability, energy performance and affordable O&M costs) Zoning follows sustainability targets, but forces towards certain solutions -> locking 50-60% of construction costs	Life cycle is observed carefully – especially optimizing life cycle costs (operation & maintenance) We have our own design guide for contrators to utilize and for us to steer the development (guides are created through our experience) -> contractors 10-y perspective is not good enough for us (contractors should understand better the long-term affects on their products	In our business we don’t actively consider life cycle thinking, we consider the value in the investment analysis (in our valuation life cycle parameters does not affect, excluding repairs the next 5-10 years) Indirectly we look at maintenance costs in valuation Additional investments can be made, but we cannot take the risk if the benefit will not come to us -> vertical business models?	Life cycle thinking is not embraced by actors within the real estate development field. The buildings value lies in the purpose (user) and design is to be flexible for future adjustments (will to invest more in D&C -> sustainable life cycle value) Purpose of real estate twofold (managed simultaneously): Ownership (technical and commercial aspect) and supporting the customers core competence	We have life cycle guidelines when we develop (design sloutions are driven through O&M costs) Our perspective is 100-200 years Between real estate development and O&M period – the “connection and understanding” can easily be worsen or lost	Quality premises (design solutions) we do not go for the cheapest total investment -> balance between short- and long-term business logic We develop from zoning, vital to steer for our business logic We dont use architectural competitions, not understanding functionality and impact on life cycle outcome Steering the design towards a holistically sustainable entity	Accessibility, services and future of the area (high tenant interest) -> adaptability very important We need to be early engagged to execute our investment strategy (all partners do not the LC perspective) Zoning, does not understand the life cycle perspective. Why limit use purposes in zoning, the market shifts quickly and zoning ammendments takes time.	LC thinking -> life cycle affordability, time lasting (materials), energy-efficient and possibility to divide units for new purposes (adaptability) We have the largest property development unit in Finland -> and thus the resources to genuinly create sustainable properties Zoning does not understand economic realities as much as they should -> private cannot do economically unviable projects	We strive to find qualitative design solutions (not the cheapest) from a technical and adaptability perspective. Possible future scenarios is to be taken into consideration When we/the market makes a lot of real estate investments the maintenance perspective is forgotten and NOI becomes central Common interest which is money – everyone is interested and should be motivated	Consider future possibilities and not only todays requirements Endurable materials, prepare to invest up-front (vs. res. fund analogy) As investor we need to be involved in the beginning to steer design and life cycle outcome Cash-flow comes from functionality, architects have too much affect on design -> important to steer them towards commercial functionality	Before we just bought real estate, today we analyze exit and a 10 y cash-flow -> we want to own with a long-term perspective (life cycle approach) -> maintenance costs and rental income Most of our partners understand our holistic view, but also actors that try to maximize their own business (e.g. developer-contractors try to maximize NOI -> not always the reality)	We invest to the “end of the world”, thus life thinking is well aligned in our investment strategy (vs. real estate funds, shorter determined time period, already thinks of the exit) Life cycle thinking begins in the location were we see that will be attractive and have a low risk on tenants/residential demand We have small resources in development -> trust on our partners (dev-con)	Sub-optimization is happening during this development – one reason may be that few can make decision for this whole “chain”, decision are made in different phases and the timing plays a significant role. Companies have different interests in these developments Keep O&M costs down because the tenant pays capital rent and O&M costs -> attract tenants and keep the facilities techically in a good sha…	Adaptability is very important – modifications during the life cycle creates costs Our development partners (contractors and designers) should understand life cycle thinking better, although it is our task to steer and demand these things (e.g. optimal life cycle design solutions) Sustainability and the certifications supports our cause
	Understanding Life Cycle Leadership	Creating quality in the built environment, our task is to partly engage it and monitor We try to enable development possibilities, not hinder them	There is a demand for LCL We dont have the means of doing this as a service. Through our life cycle models we have outsourced this risk (motivating the service provider to increase quality) How to measure this added value? Could maintenance companies extend their responsibility?	Life cycle leadership could be achieved through co-operation between different parties	In design decisions and solutions considering different life cycle options – evident in the zoning process Our partners understand this in principle, but business models need profit all the time, they can not accept profits after longer periods Feasibility has to come directly – not in 10 years, leads to “short-sighted seeing”, we need mechanisms for long-term development in both design and const…	The municipalities does not have expertise in LCL – what is financially rational? We create silos which lead to sub-opt. -> no genuine leadership for the same "product", no one takes reponsibility for the big picture The problem is that contractors focus on constr. and inv. want to buy a ready product (no RED org.) Reason for lack of LCL is genuinly understanding the other parties business model	Life Cycle Leaderhip a good term! The client does not see or demand life cycle perspectives – which is unfortunate	The leader has to lead and delegate the work towards achieving the targets and presenting different perspectives	Material and equipment choices are to be optimized for the life cycle Zoning is unable to see and understand the life cycle of the urban area /real estate, they only focus on aesthtics and city scape quality Certain clients have this “leadership” philosophy in their development/management activities (energy consumption), they have some kind of LCC calculations -> High target setting in both new a…	I believe in design professionally, construct professionally and “marry it” for the next 25 years! Time perspective vs. business model cycles is challenging in LCL	There is life cycle leadership when the development is by the investor/owner themselves -> target is to own long-term -> requires that the ownership/money stays on the same investment vs. short-term investment where the entities does not represent life cycle leadership. There are different incentives through various business models, the owners interest is the true LCL	The owner/investor should consider the life cycle of the building Life cycle thinking is not seen in our everday work, more daily routines and annual time-period Life cycle costs represent the major (x10) costs of properties (vs. design, development and construction) -> development here in terms of communication between different parties in order to optimize from a life cycle perspective	No leadership is required – everyone should know their responsibility and the value chain works (alignment of business models) Through trust and understanding we can overcome extra and unrelevant issues and develop towards improved co-operation	LCL could be more driven in an urban context with the city as the main driver -> commiting more stakeholders (genuine economic benefit for each party) -> challenging to coordinate because of complexity of the project Awareness for the people and residents about sustainability – when are they prepared to pay for these solutions, € is the right way to affect today – economic viability	LCL is about managing our building stock (allocating maintenance funds to most attractive appartments (market-based)) We see that we have control of LCL, but regular Housing Companies would need this service analogy As for zoning, they have a lot to learn in terms of long-term development and life cycle outcomes	Sounds more expensive and holistic If LCL would be executed consistently it would mean large savings in the long-run (an desirable and appropriate ideology for public investment entities) Sustainability would be enhanced through this model	Life cycle leadership is delivered through creating the value in co-operation with all parties -> Value Co-creation Common objectives and targets are very important to steer towards a common outcome – the targets (and product) will possible change during the process (difficult to understand for traditional actors (designers & contractors). Functionality is the key to life cycle value!	We are in a way the life cycle leaders We allocate a lot of money in maintaining the buildings -> sanction/bonus mech with partners to motivate better maintenance of assets All public entities should have a long-term perspective investment analogy (as we have)	When it comes to (life cycle) leadership the owners/investors are responsible (market booms in the past has lead to neglection of life cycle perspective) Lack of understanding and clear targets may lead to a unsustainable product from a life cycle perspective We need to maintain and increase the value of our assets -> correlates with life cycle thinking (€ the primary driver!)	For example, differentiating life cycles within the building; superstructures is different than HVAC. Office premises are changing – this has to be taken into consideration within adaptability solutions (users are present 5-7 years, the first user that not pay for future vacancy -> may lead to sub-optimization)	We see ourself as a life cycle leader (what I understand of it – we HAVE TO BE) cause we operate them Ultimately – the real estate owner is responsible! (contractors and managers have certain responsibilities)	There should be one stakeholder in the project organisation who takes responsibility of the life cycle outcome -> justified through economic viability Adapability is very important Challenge is to get people looking across -> needs leadrship and clear targets Public authority (zoning, land use, building permits) should be more constructive and flexible	Leaderhip has to be one stakeholders responsibility, but the support has to come from functions below e.g. contractor in this project (management commitment) We need a leader that can see “over” this project into the future (additionally urban development scope to integrate into the community) Life cycle leader can be a consultant – but it must understand the pricniples of the owner, not the city	We define our market value for our properties every 6 months, and thus understand what has to be done (leadership) to the facilities so that they will maintain their value Balancing and optimizing the value of the property and identifying elemts to be developed (sometimes larger investments has to be done) Sub-optimization here can be fatal (just to get good numbers temporarly)	In life cycle leadership, I see that the producer has to take responsibility of the product – in life cycle models (25y) this thinking is seen, but not when you create something for someone else! This should be driven through a bonus/sanction mechanism E.g. 10 years guarantee (general contractual terms) should be appropriate…	We have a designers manual to guide the designers containing example solutions Our partners understand these, but there are different interests in this matter. For us the economic viability is important Zoning have other more important factors than economic viability The contractor and O&M world need to integrate -> value adding synergies	To manage debt of repair (korjausvelka) Some parts are 30 years old and the premises is in a constant need of repair
	Responsibility of Life Cycle	It is a bit diffuse who is responsible Zoning has a significant role in the whole picture, however, we do not manage value development in the built environment The challenge is that stakeholders dont understand each other and their viewpoints and common targets are not set, leads to suboptimization Enhance partnership in zoning and make the process lighter and more flexible	It is a difficult question, the investor is only interested in the cash-flow, it is not the cities responsibility to be a life cycle leader Investors/owners bears the responsibility (different kind of investors) Now responsibilities are split and uncontrolled Could service companies extend their role towards life cycle management?	Before I would have said it would be the private side (deveolper and investor), but today I am leaning towards the city. We see that we have the tools to lead LCL in urban development. An investor has a longer responsibility and thus a good candidate for this, “one time” contractors is not the best candidate here. The city should understand the developers/investors business model so that they can…	For our part it is, but when it comes to developer-contractor-investor, there is a lack of reponsibility It goes like a bar where no stakeholder overlaps each other, and we need this overlapping for this to develop (dev/cont/inv), but no one takes the whole responsibility Investors are only interested in the cash-flow and not of the functionality of the property, they should take a longer perspec…	No, this is problematic When the city develops for itself, it has to be the “leader”, but when there is a private consortia (e.g. Kamppi, Kalasatama or Keski-Pasila) involved they will have to take the leadership and coordination role Leadership through common targets (including mechanisms and contracts) -> ability to make comparisons what is rational	No clear stakeholder Owner of the project should have the interest for LCL, challenging in com. RED were ownership periods are short The LC leader does not need all knowledge -> organize work in a smart way All business models/profit models have to be clear to everybody. All parties working together (also users and FM pers.)	There is not enough LCL today – there should be more! Respobsilibility should sit with the client which has the incentive The challenge is LCL falls between other disciplines, coordination between business models (desg., contr., FM) and setting common targets for the project	Conflicting because in urban development the city has roles creating the economic framework for development which is then taken over by the private side. The city has the responsibility, but the long-term economic interest sits with the owner/investor Investors (user-investors) should be (have the interest) developers if we are to achieve sustainable life cycle optimized built environment	No one is responsible It should be the investor (more active role), usually they buy a “ready” package and is not early enough involved => more long-term and life cycle thinking In the beginning of the development there is not a life cycle perspective and incentives, developer needs tenants (3 year thinking) The investor should invest profitably and long-term! (especially institutional)	There is life cycle responsibility when the investor is leading the development The investors perspective should ba applied by all in the development	In the beginning it is very splitted, no one has the overall responsibility. We have the knowledge and are present every day We may have the business potential as a manager, but certain restrictions make it difficult The investor sits on the money, therefore be involved earlier in the development phase -> a seamless process execution Ideologically, investor-user would be the one to lead the devel…	Yes, the one producing the product (appartment) -> contractors are responsible (steering designers) in developing a product that has a sufficient life cycle outcome We are an investor and should not have to steer the product and how it is developed. We do not have a “rakennuttaja” organisation. Our job is not to tell the developer how it is done – because then we are making wrong things.	We can be responsible for our own portfolio – but not the “whole” development We need a coordinator – someone to commit all parties -> maybe the city? We see that life cycle targets are important, but other investors, such as funds, they are only interested in getting the money via the exit!	In the residential investment business we are the life cycle “leader”	The life cycle responsible could either be the producer or the client? If the client has a big enough organisation it could be there. In this case we would outsource it to the producer (we don’t have the resources, they sell a complete package (including the LCL service)), but the interest sits with the client (investor) The end users looks at the costs (short-term benefits) which are marginal (r…	Hard to answer – it is more about co-creating We try to represent a new kind of real estate owner and challenge other actors within the field Even though our users say we are “a little” expensive we believe we are delivering added value through efficient spaces (better utilization rate and higher capital employed)	For our facilities we are. And it should be the owner.	Owners and investors should be responsible Public/zoning does not have the commercial understanding (not involved in the O&M phase) BM conflicts: Developer contractors want to develop as much as possible (feasible?), and land owners and municipalities maxmize zoning sqm (vs. actual demand) -> Not sustainable	The one who negotiates the use purpose and the users. After that changes cannot be done anymore. The coordination responsibility should be through one party Different things are important at different stages duringthe development process More co-operation -> especially vertical Architects have a significant role and impact -> important to steer them!	Yes – the owner Life cycle expertise can be bought, but leadership comes with reponsibility (consultants does never make decisions) Residential funds does not do these because of a short exit time -> interested in the profit and cash-flow	The responsibility sits with the real estate investor/owner, they should manage or supervise this –> but there is not a specific and credible service for this in the market We as an investor should have the interest and funds to supervise this aggregate life cycle management/analysis	In some cases there is a responsible, but generally not. Business models/bonus targets are in conflict within the project and common targets! Who wants change -> all, who want to change -> no one! This is our industry Contractors should take more responsibility into the O&M period	LCL is in the interest of the investor (value, sellability, environment, energy and a satisfied user) -> finding a win-win situation Zoning should attain more economic knowledge – their role is significant for the life cycle Everyone needs to have the same target and forget sub-optimization Complexity is the main challenge in urban development	No there is not. Well yes, the one with the money (investor) Producers live by searching for new development and not being so interested in the executed ones… Resources for this are needed, but not from us. This is not our core business, but we as the investor have the highest interest for this!	The owner is of course the one responsible. It is not about developing and constructing – it’s the functionality, the tenants satisfaction, supporting their business which is the main point -> Cash-flow	It should be the owner/investor (Developers, contractors and designers comes secondary) The challenge is when the investor comes into the picture the “big solutions” are locked in, and challenging to change Inspite of business models it is about understanding other stakeholders perspective In shopping centres, architects need to understand the business models
	Value Creation?	Yes - a life cycle perspective could maybe be enforced? The best way is to increase understanding of life cycle by every stakeholder Aligning end-users demand could be one way to identify common targets and increase understanding	Yes City "feeling", image, secure environment is very important. If areas are socially unviable, this affects rent levels and business in the area -> "bad circle"	Yes, through increased co-operation Regurarly opening up the logics of the project parties Urban design management, an objevtive system integrator (who is objective?) "There is a need for LCL, but is there a clear demand?"	Yes We should overlapp each other in this process to understand each other and improve this process	Yes, through leadership and organizing the project in the right way	Yes, but it has to be done together E.g. lower maintenance costs could be seen as a sales premium…	Yes	For individual real estate, YES, very much value to gain For Urban areas this is more complex and many factors are involved and has to be taken into consideration	Yes, but it is difficult to verify when there is so little research done within the area. Investors should have the data and has the possibility to analyse how the faclities should be maintained (especially in the public sector there should be interest for this)	Life cycle Leadership should be driven by the market value (understood by the investor)! Everyone should focus and emphasize on the market-value (from management downwards) -> justifying “added” market value for the investor (not just 1-year NOI capitalized) -> that is the key for driving life cycle value/leadership!	Yes possible, but the interests that are involved are not aligned, everyone optimizes in their own way (difficult to identify common benefits) In monetary parameters e.g. maturity of rental leases have a higher significance to the economic equation The current model works ok, but investors should engage earlier	Yes We make some “additional” investment which we see beneficial (heatingmonitoring, glazed balcomines and durable flooring materials) Additionally, from my research  there is life cycle value to be gained through Public-Private-Partnerships and the functionality synergies	Yes Developing all the time through improving attitude and appreciation Conflicts between business models are of course a part of the reason -> a balanced model for this?	Yes, for us definetely O&M cost savings and environmental savings correlate Inhouse PM and rental service -> No internal optimization and added customer value	Yes, economic (€) – but at what point is it realized (purchse, operation, transaction…?) In order for justify future value we need valid evidence and reliable data	Yes, creating value together	Yes – we are just in the beginning of this LCL development Use purposes are changing quicker and thus this needs to be developed in the future -> Easier for services to adapt than buildings € should be the primary motivator, rest of sustainability will follow Adaptability is very important from a life cycle perspective (strong linkage to economic parameters)	Yes, value can be achieved, but what are the means and methods?	Yes	Yes, it is simple and logical If the real estate consumes 50 cent less in O&M we can allocate it to the capital lease (tenant pays total lease) which means that the real estate value rises by 2-3% -> 100 M € real estate becomes 103 M €! The different comes from differences in perspective -> what is their investment horizon	Yes, I believe so. Shared value through life cycle perspective has to be further created and developed	Yes, definetely Idea: Life cycle risk to life cycle value?	Yes, it is possible, through common goals and targets (bonus and sanctions into the operational phase and new attitude to development) We need a mechanism to share this value between different parties -> The alliance model may have some interesting ideas for this...	Yes, absolutely Both ecological and social responsibility is important for us Primarily economic (from law, people need their pensions), but also environmental and social (essential in our investment strategy)	Yes	Yes, but... Everyone does not perceive and understand the magnitude of costs in the maintenance phase In the construction is tied up a great deal of the costs Understanding the difference between the technical and commercial life cycles From experience; usually life cycle works (PTS) is neglected and not maintained as they should
	Tools for improving Life Cycle	Not familiar with these tools, they should be deveolped and there should be enough data to utilize them Target-oriented tools, setting common targets, monitoring and achieving them together	Not familiar with tools for LCL, we dont have a systematic way to maintain and manage from a life cycle perspective An areal life cycle management company with both public and private stake	The best tool would be understanding other parties logic and go through these regularly Urban design management, system integrator (objective), the challenge is the objectivity, this entity should still get paid by someone… If consultant -> Agent theory...	We need to improve our tools (LCC) in order decrease uncertainities during the life cycle We need more real estate management perspectives to design and construction Business model ideologies and their philosophy needs to be revisited and re-organized in order to position themselves better to take responsibility	Finding the mechanisms to work together and increasing multidisclinary people into the organisation Basic reporting and calculations which is lead by monitoring and thus developing to the right direction (simple and applicable KPIs (same as running a business))	Tools are to be used as SUPPORT (tools as tools) The important thing is the attitude – how to work together to achieve better life cycle performance New models should be created together so that everyone is commited to the project Importance in defining targets and following up BIM helps, but not the solution	The main thing to endorse LCL is still partnership and co-operation and working close together (integrated design!) Tools are important and should be used to following targets actively. Same information/document (targets) should be more continuous within a projects life cycle => information flow! Tools have to support the functionality	Tools are important, a strong supportive function Defining better targets for projects which enhance life cycle performance We go to quickly to new risky technological novelties -> huge life cycle costs (e.g. stringent energy performance) A building should be aesthetic, sustainable and functional, we are behing on the sustainability!	The leadership model: 1. Integrated design solution/process would be a good start 2. Also life cycle tools to justify added value	Tools have a fairly little role in this… Better data is attained from benchmarking and references In a new building the information comes naturally. More information would cost in the O&M phase, but no one is willing to invest in this Certification tools may be important for foreign investors. Maybe improtant for larger global tenants. Certifications also takes an O&M perspective, which is good	Tools have a role if we are to create a more seamless execution model We are willing to invest in tools through our clients Leadership by information and knowledge (today a lot of different systems -> challenging to manage information)		There is very different kinds of LC tools – but they are not commonly measured, comparable and transparent -> we need a tool with a certain status and approval -> better criteria (now this is not managed) We have done LCC of different alternatives (e.g. ground source heating case)	Electrical PM service to ensure quality of O&M services -> better customer satisfaction LCC for the whole porfolio (not only for one building) BIM in new but challenging in old buildings. BIM in FM, benefits first afetr 20-30 years Cretifications, yes, if customers would demand them	The most significant factor is valid and reliable data (information) If there is no available benchmarking data, the life cycle premium does not attain a value How are these tools utilised reasonably (reliability) Best practices and benchmarking data should be shared One tool to enhance LCL would be the residential housing companies rating tool for condition survey		Certification: LEED and BREEAM are done for transaction based commercial development – we don’t see the transaction premium	Tools are important for the development -> but what would be a common tool? The design professions is fragmented (quality decreasing, more focus on IDP and LCM) We need solutions on the practical level with long-term delivery and responsibility (e.g. HVAC life cycle solutions as a service) LCC analogy good, but credibility! Huge potential through BIM in LC	We have not identified tools for LCL Parameters and starting values are difficult to define A tool could be a design guide for the projects (targets) to steer solutions (compare different life cycles for different part of the building) -> what to invest in? -> this does not have to be technical objectives, more of a target setting (from the client)	Life cycle issues will enhance with more stringent energy requirements Idea: emission-based real estate tax? End-users involved in using facilities correctly We do life cycle calculations (simulations) were we compare alternatives and payback times -> utilizing lake cooling and energy sharing in a the larger urban development context	The market should demand these methods and there may be business possibilities here (and of course in life cycle leadership) -> Naturally there should be a demand for this LCC is smart, read about it in school, not utilised, Too difficult or many uncertain parameters -> credibility?	LCA coming through CSR (carbon) We do LCC for HVAC, elevators etc. We have a strong O&M pespective FM/PM providers involved earlier -> significant affect! Potential in synergies between contractor and FM provider Everyone should use "life cycle models" -> why only in public procurement BIM and information flow important	A tool through which you can manage the feasibility of a property, simple and reliable which attains all the right and necessary information (we now have too many different systems and data) -> identify deviaitions to react upon We have information (KTI), how to utilize it properly?	For the owner it would be great if there would be some life cycle tools (LCC) which would gather all data in the beginning and assisst in creating life cycle worksplan (PTS) and portraying the future maintenance costs (budgeting) -> these tools should already exist! BIM for new facilities (older difficult to implement) Certificates in transactions	Monitoring energy consumption -> reacting on deviations LCC, the longer time period -> more uncertanities -> more risk Designers should present more alternatives from a life cycle perspective – this would be added value (including data) – The owner is still responsible and designers are in the service business Certification bring systematic discipline to the process	Tools are good to have The starting point should be the life cycle plan -> investing in this does not increase NOI, rather prevents from falling Information management would be good to update and manage properly -> a lot to develop! -> Should be standardized If not certificated it will limit out certain buyers
